# Supplementary material for: RoboEM: automated 3D flight tracing for synaptic-resolution connectomics
Source: PubMed Central journal article supplement (PMC11093750; doi:10.1038/s41592-024-02226-5), 2024-03-21
Supplement: 41592_2024_2226_MOESM2_ESM.pdf [file 41592_2024_2226_MOESM2_ESM.pdf]

## Reporting Summary

Nature Portfolio wishes to improve the reproducibility of the work that we publish. This form provides structure for consistency and transparency in reporting. For further information on Nature Portfolio policies, see our [Editorial Policies](#) and the [Editorial Policy Checklist](#).

### Statistics

For all statistical analyses, confirm that the following items are present in the figure legend, table legend, main text, or Methods section.

- |                                     |                                                                                                                                                                                                                                                                                                |
|-------------------------------------|------------------------------------------------------------------------------------------------------------------------------------------------------------------------------------------------------------------------------------------------------------------------------------------------|
| n/a                                 | Confirmed                                                                                                                                                                                                                                                                                      |
| <input type="checkbox"/>            | <input checked="" type="checkbox"/> The exact sample size ( $n$ ) for each experimental group/condition, given as a discrete number and unit of measurement                                                                                                                                    |
| <input checked="" type="checkbox"/> | <input type="checkbox"/> A statement on whether measurements were taken from distinct samples or whether the same sample was measured repeatedly                                                                                                                                               |
| <input type="checkbox"/>            | <input checked="" type="checkbox"/> The statistical test(s) used AND whether they are one- or two-sided<br><i>Only common tests should be described solely by name; describe more complex techniques in the Methods section.</i>                                                               |
| <input checked="" type="checkbox"/> | <input type="checkbox"/> A description of all covariates tested                                                                                                                                                                                                                                |
| <input checked="" type="checkbox"/> | <input type="checkbox"/> A description of any assumptions or corrections, such as tests of normality and adjustment for multiple comparisons                                                                                                                                                   |
| <input type="checkbox"/>            | <input checked="" type="checkbox"/> A full description of the statistical parameters including central tendency (e.g. means) or other basic estimates (e.g. regression coefficient) AND variation (e.g. standard deviation) or associated estimates of uncertainty (e.g. confidence intervals) |
| <input checked="" type="checkbox"/> | <input type="checkbox"/> For null hypothesis testing, the test statistic (e.g. $F$ , $t$ , $r$ ) with confidence intervals, effect sizes, degrees of freedom and $P$ value noted<br><i>Give <math>P</math> values as exact values whenever suitable.</i>                                       |
| <input type="checkbox"/>            | <input checked="" type="checkbox"/> For Bayesian analysis, information on the choice of priors and Markov chain Monte Carlo settings                                                                                                                                                           |
| <input checked="" type="checkbox"/> | <input type="checkbox"/> For hierarchical and complex designs, identification of the appropriate level for tests and full reporting of outcomes                                                                                                                                                |
| <input checked="" type="checkbox"/> | <input type="checkbox"/> Estimates of effect sizes (e.g. Cohen's $d$ , Pearson's $r$ ), indicating how they were calculated                                                                                                                                                                    |

*Our web collection on [statistics for biologists](#) contains articles on many of the points above.*

### Software and code

Policy information about [availability of computer code](#)

Data collection

Data analysis

For manuscripts utilizing custom algorithms or software that are central to the research but not yet described in published literature, software must be made available to editors and reviewers. We strongly encourage code deposition in a community repository (e.g. GitHub). See the Nature Portfolio [guidelines for submitting code & software](#) for further information.

## Data

Policy information about [availability of data](#)

All manuscripts must include a [data availability statement](#). This statement should provide the following information, where applicable:

- Accession codes, unique identifiers, or web links for publicly available datasets
- A description of any restrictions on data availability
- For clinical datasets or third party data, please ensure that the statement adheres to our [policy](#)

All data necessary to reproduce reported results for the mouse cortex SBEM dataset (Motta et al. 2019) are available: <https://wklink.org/9276> (raw data), <https://L4dense2019.brain.mpg.de> (code and data of the original publication); trained RoboEM weights, and evaluation data are available in the supplement subject to provisions as stated in the code availability section (see above).

Raw data for the mouse cortex multiSEM dataset are available: Si1113 <https://wklink.org/2458> (spine head attachment test set), Si150L4 <https://wklink.org/7122> (axon test set); RoboEM training data and trained RoboEM weights to reproduce results for the mouse cortex multiSEM dataset are available upon reasonable request. Raw data for the human cortex multiSEM dataset (Shapson-Coe et al. 2021) are available: <https://h01-release.storage.googleapis.com/landing.html>; RoboEM training data and trained RoboEM weights to reproduce results for the human cortex multiSEM dataset are available upon reasonable request. In addition, data needed to run the example code is part of the zipped code package provided in the supplementary material subject to provisions as stated in the code availability section (see above).

## Human research participants

Policy information about [studies involving human research participants and Sex and Gender in Research](#).

|                             |                                  |
|-----------------------------|----------------------------------|
| Reporting on sex and gender | <input type="text" value="n/a"/> |
| Population characteristics  | <input type="text" value="n/a"/> |
| Recruitment                 | <input type="text" value="n/a"/> |
| Ethics oversight            | <input type="text" value="n/a"/> |

Note that full information on the approval of the study protocol must also be provided in the manuscript.

## Field-specific reporting

Please select the one below that is the best fit for your research. If you are not sure, read the appropriate sections before making your selection.

Life sciences       Behavioural & social sciences       Ecological, evolutionary & environmental sciences

For a reference copy of the document with all sections, see [nature.com/documents/nr-reporting-summary-flat.pdf](https://nature.com/documents/nr-reporting-summary-flat.pdf)

## Life sciences study design

All studies must disclose on these points even when the disclosure is negative.

|                 |                                                                                                                                                                                                                                                                                                                                                                                                                                                                                                                                                                                                                                                                                                                                                                                                                                                   |
|-----------------|---------------------------------------------------------------------------------------------------------------------------------------------------------------------------------------------------------------------------------------------------------------------------------------------------------------------------------------------------------------------------------------------------------------------------------------------------------------------------------------------------------------------------------------------------------------------------------------------------------------------------------------------------------------------------------------------------------------------------------------------------------------------------------------------------------------------------------------------------|
| Sample size     | n=3 three dimensional electron microscopy datasets were used to ensure variabilities from acquisition/imaging modalities (SBEM versus multiSEM) and species (mouse versus human) have no negative impact on performance; however, the main conclusions of this study rely on the sample sizes and/or path lengths from manually proof-read axons (see below);<br>n=90 ending queries and n=100 chiasma queries of axons were used to compare RoboEM neurite tracings with human neurite tracings;<br>n=5 random axons for the two multiSEM datasets and n=10 random axons for the SBEM dataset were used with similar total path lengths of over 1 millimeter were used for evaluation of split and merge error rates;<br>n=91 spine heads were used in the multiSEM dataset by Sievers et al. to evaluate attachment of spine heads using RoboEM |
| Data exclusions | No data were excluded.                                                                                                                                                                                                                                                                                                                                                                                                                                                                                                                                                                                                                                                                                                                                                                                                                            |
| Replication     | Reconstruction algorithms as described in this study were successfully run on multiple datasets by different scientists confirming the results of this study.<br>Source code and data required to reproduce results are made available as indicated in the code and data availability sections.                                                                                                                                                                                                                                                                                                                                                                                                                                                                                                                                                   |
| Randomization   | All samples were selected randomly without input from investigators.<br>Randomization was done using pseudo-random number generators in MATLAB or Python.                                                                                                                                                                                                                                                                                                                                                                                                                                                                                                                                                                                                                                                                                         |
| Blinding        | N/A                                                                                                                                                                                                                                                                                                                                                                                                                                                                                                                                                                                                                                                                                                                                                                                                                                               |

# Reporting for specific materials, systems and methods

We require information from authors about some types of materials, experimental systems and methods used in many studies. Here, indicate whether each material, system or method listed is relevant to your study. If you are not sure if a list item applies to your research, read the appropriate section before selecting a response.

## Materials & experimental systems

| n/a                                 | Involved in the study                                           |
|-------------------------------------|-----------------------------------------------------------------|
| <input checked="" type="checkbox"/> | <input type="checkbox"/> Antibodies                             |
| <input checked="" type="checkbox"/> | <input type="checkbox"/> Eukaryotic cell lines                  |
| <input checked="" type="checkbox"/> | <input type="checkbox"/> Palaeontology and archaeology          |
| <input type="checkbox"/>            | <input checked="" type="checkbox"/> Animals and other organisms |
| <input checked="" type="checkbox"/> | <input type="checkbox"/> Clinical data                          |
| <input checked="" type="checkbox"/> | <input type="checkbox"/> Dual use research of concern           |

## Methods

| n/a                                 | Involved in the study                           |
|-------------------------------------|-------------------------------------------------|
| <input checked="" type="checkbox"/> | <input type="checkbox"/> ChIP-seq               |
| <input checked="" type="checkbox"/> | <input type="checkbox"/> Flow cytometry         |
| <input checked="" type="checkbox"/> | <input type="checkbox"/> MRI-based neuroimaging |

## Animals and other research organisms

Policy information about [studies involving animals](#); [ARRIVE guidelines](#) recommended for reporting animal research, and [Sex and Gender in Research](#)

|                         |                                                                                                                                                                                                                                                                                                                                                                                                                                                                                                         |
|-------------------------|---------------------------------------------------------------------------------------------------------------------------------------------------------------------------------------------------------------------------------------------------------------------------------------------------------------------------------------------------------------------------------------------------------------------------------------------------------------------------------------------------------|
| Laboratory animals      | Experiments were performed on laboratory animals, species mus musculus, strain C57BL/6-J from age P5 until 6 months.                                                                                                                                                                                                                                                                                                                                                                                    |
| Wild animals            | No wild animals were used.                                                                                                                                                                                                                                                                                                                                                                                                                                                                              |
| Reporting on sex        | Experiments were approved for male mice. Sex was approved in animal husbandry and only male mice were used for experiments and sample preparation.<br>Reason for exclusion of females was comparability with already published data, no further knowledge so far about the influence of estrus, combined with low sample numbers prepared in the studies.                                                                                                                                               |
| Field-collected samples | No field collected samples were generated/used.                                                                                                                                                                                                                                                                                                                                                                                                                                                         |
| Ethics oversight        | Experiments were performed as part of the approved animal research project "Nervenzellschaltkreise Grosshirnrinde Nager". Approval was granted from the Animal Welfare Agency, Regional Council of Darmstadt/Tierschutzbehörde, Regierungspräsidium Darmstadt, file number: V54-19c20/15-F126/1002. The approval was granted from Feb. 18th 2015 until Feb 17th 2020. Ethical guidance on the study protocol was provided by the Animal Welfare Officer of the Max Planck Institute for Brain Research. |

Note that full information on the approval of the study protocol must also be provided in the manuscript.
